# Supplementary material for: Downregulated Platelet miR-1233-5p in Patients with Alzheimer’s Pathologic Change with Mild Cognitive Impairment is Associated with Aβ-Induced Platelet Activation via P-Selectin
Source: PubMed Central journal article supplement (PMC7357133; doi:10.3390/jcm9061642), 2020-05-29
Supplement: jcm-09-01642-s001.pdf [file jcm-09-01642-s001.pdf]

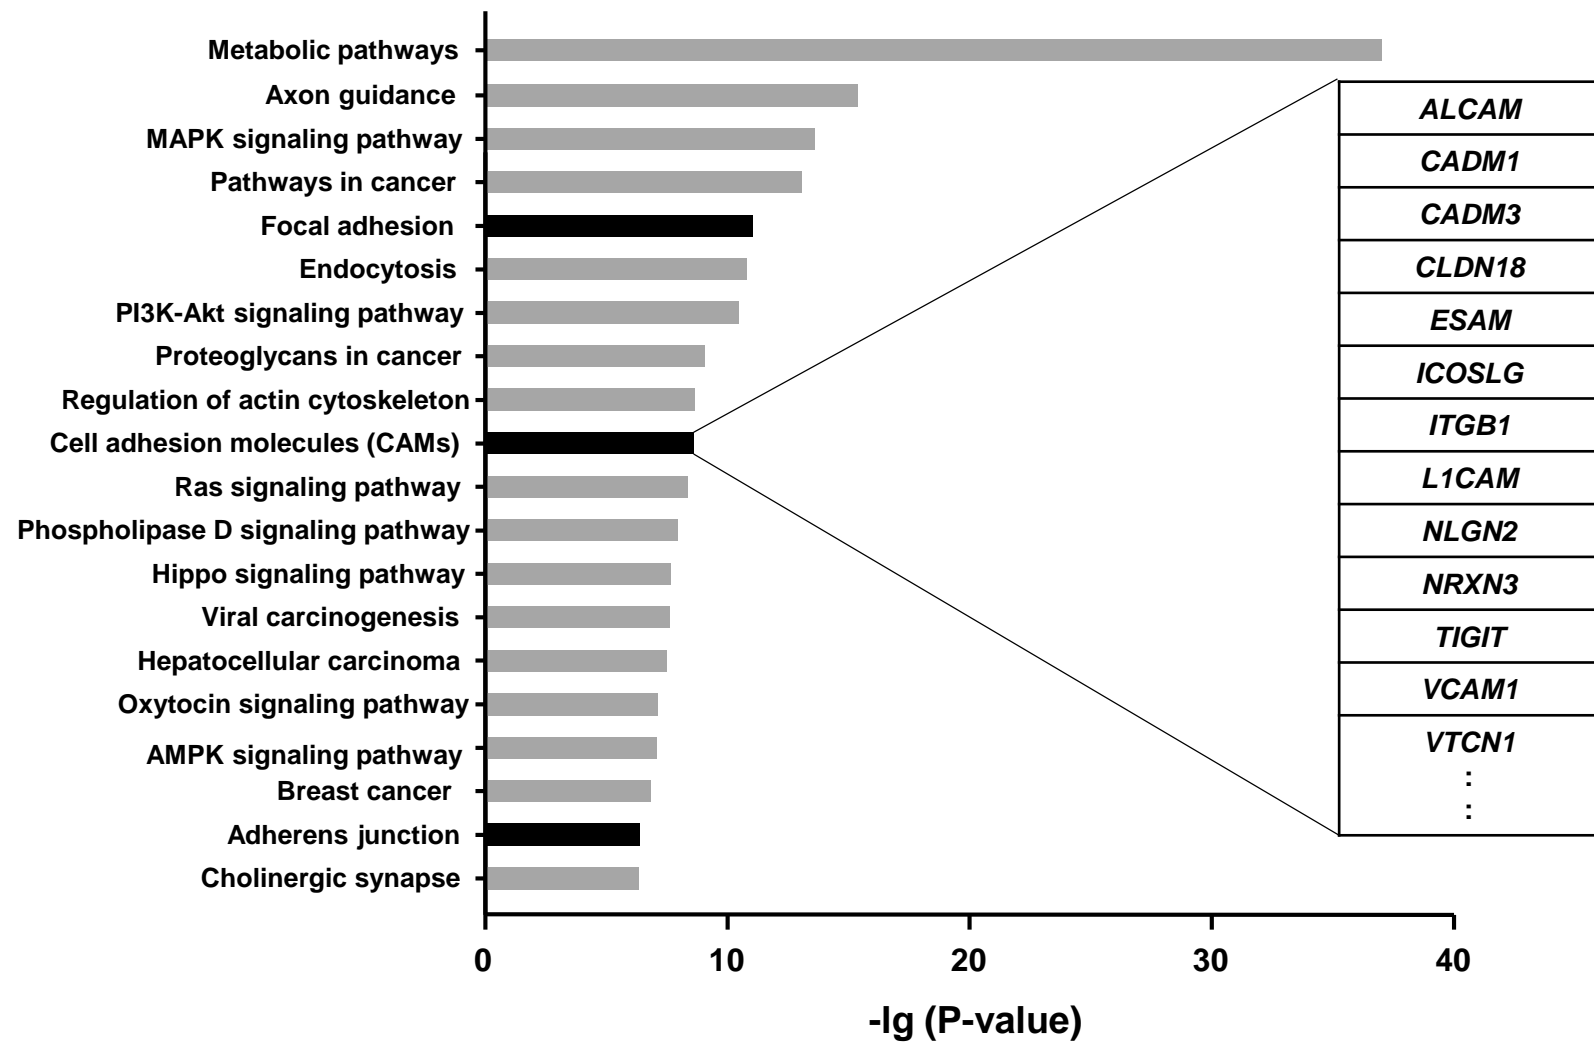

**Supplementary Figure S1.** Kyoto Encyclopedia of Genes and Genomes (KEGG) pathway enrichment analysis for miR-1233-5p target genes using the DAVID bioinformatics tool. The top 20 highly enriched KEGG pathways and cell adhesion molecules (CAMs)-related genes were represented.
